1 **Title:** Pyronaridine Tetraphosphate Efficacy Against Ebola Virus Infection in Guinea Pig

2 **Short running title:** Pyronaridine efficacy against Ebola virus

3

4 **Authors:** Thomas R. Lane<sup>at</sup>, Christopher Massey<sup>bt</sup>, Jason E. Comer<sup>b,c,d</sup>, Alexander N.  
5 Freiberg<sup>d,e</sup>, Huanying Zhou<sup>f</sup>, Julie Dyall<sup>f</sup>, Michael R. Holbrook<sup>f</sup>, Manu Anantpadma<sup>g\$</sup>,  
6 Robert A. Davey<sup>g#</sup>, Peter B. Madrid<sup>h</sup> and Sean Ekins<sup>a#</sup>

7

8 **Affiliations:** <sup>a</sup> Collaborations Pharmaceuticals, Inc., 840 Main Campus Drive, Lab 3510,  
9 Raleigh, NC 27606, USA.

10 <sup>b</sup> Institutional Office of Regulated Nonclinical Studies, University of Texas Medical  
11 Branch, 301 University Blvd., Galveston, TX 77555, USA

12 <sup>c</sup> Department of Microbiology and Immunology, University of Texas Medical Branch, 301  
13 University Blvd., Galveston, TX 77555, USA

14 <sup>d</sup> Sealy Institute for Vaccine Sciences, University of Texas Medical Branch, 301  
15 University Blvd., Galveston, TX 77555, USA

16 <sup>e</sup> Department of Pathology, University of Texas Medical Branch, 301 University Blvd.,  
17 Galveston, TX 77555, USA

18 <sup>f</sup> Integrated Research Facility, Division of Clinical Research, National Institute of Allergy  
19 and Infectious Diseases, National Institutes of Health, Frederick, MD, USA

20 <sup>g</sup> Texas Biomedical Research Institute, San Antonio, TX 78227, USA.

21 <sup>h</sup> SRI International, 333 Ravenswood Avenue, Menlo Park, CA 94025, USA.

22

23 <sup>\$</sup>Current address: Boston University, National Emerging Infectious Diseases  
24 Laboratories, 401P, 620 Albany Street, Boston, MA 02118.

25 #To whom correspondence should be addressed: Sean Ekins, E-mail address:  
26 sean@collaborationspharma.com, Phone: +1 215-687-1320

27 <sup>†</sup> Co-first authors, identified alphabetically by SE.

28

29

30

31 **Abstract**

32 The recent outbreaks of the Ebola virus (EBOV) in Africa have brought global visibility to  
33 the shortage of available therapeutic options to treat patients infected with this or closely  
34 related viruses. We have recently computationally identified three molecules which have  
35 all demonstrated statistically significant efficacy in the mouse model of infection with  
36 mouse adapted Ebola virus (ma-EBOV). One of these molecules is the antimalarial  
37 pyronaridine tetraphosphate (IC<sub>50</sub> range of 0.82-1.30 µM against three strains of EBOV  
38 and IC<sub>50</sub> range of 1.01-2.72 µM against two strains of Marburg virus (MARV)) which is  
39 an approved drug in the European Union and used in combination with artesunate. To  
40 date, no small molecule drugs have shown statistically significant efficacy in the guinea  
41 pig model of EBOV infection. Pharmacokinetics and range-finding studies in guinea pigs  
42 directed us to a single 300mg/kg or 600mg/kg oral dose of pyronaridine 1hr after  
43 infection. Pyronaridine resulted in statistically significant survival of 40% at 300mg/kg  
44 and protected from a lethal challenge with EBOV. In comparison, oral favipiravir (300  
45 mg/kg dosed once a day) had 43.5 % survival. The *in vitro* metabolism and metabolite  
46 identification of pyronaridine and another of our EBOV active molecules, tilorone, which  
47 suggests significant species differences which may account for the efficacy or lack  
48 thereof, respectively in guinea pig. In summary, our studies with pyronaridine  
49 demonstrates its utility for repurposing as an antiviral against EBOV and MARV,  
50 providing justification for future testing in non-human primates.

51

52

53 **Importance**

54 There is currently no antiviral small molecule drug approved for treating Ebola Virus  
55 infection. We have previously used machine learning models to identify new uses for  
56 approved drugs and demonstrated their activity against the Ebola virus *in vitro* and *in*  
57 *vivo*. We now describe the pharmacokinetic properties of the antimalarial pyronaridine in  
58 the guinea pig. In addition, we show that this drug is effective against multiple strains of  
59 EBOV and MARV *in vitro* and in the guinea pig model of Ebola virus infection. These  
60 combined efforts indicate the need to further test this molecule in larger animal efficacy  
61 studies prior to clinical use in humans. These findings also may be useful for  
62 repurposing this drug for use against other viruses in future.

63

64 **Keywords:** Antiviral, Ebola virus disease, Favipiravir, Guinea Pig, Pyronaridine

65

## 66 **Introduction**

67 Repurposing drugs for different diseases offers the opportunity to take a molecule that  
68 is approved for one clinical use and apply it to another disease, potentially accelerating  
69 its application and approval (1-3). There have been many articles on this approach and  
70 its successes (4). Several examples demonstrate repurposing compounds for the Ebola  
71 virus (EBOV) (5-7) which is a member of the virus family *Filoviridae* and pathogenic in  
72 both humans and non-human primates, causing severe hemorrhagic fevers (8) with  
73 mortality rates as high as 90% (9, 10). The recent outbreaks of EBOV in Africa have  
74 highlighted the need for new antiviral drugs for this and other emerging viruses to  
75 counter the human and financial cost (11, 12). The outbreak in Western Africa in 2014-  
76 2016 killed over 11,000 and caused over \$53bn in economic damage (13). The current  
77 ongoing outbreak in the Democratic Republic of the Congo, in which well over 2200  
78 people have died to date at the time of writing, and where the current case fatality is  
79 ~67% (14)), emphasizes this need for new drugs while there is still no FDA approved  
80 drug for this disease. Several small molecule drugs such as favipiravir (15, 16) and  
81 most recently remdesivir (17) have been tested against EBOV in patients, although it is  
82 unclear whether any of them demonstrate efficacy (18, 19). We have previously used a  
83 computational approach with a published high-throughput screen of 868 molecules  
84 tested in a viral pseudotype entry assay and an EBOV replication assay (20, 21). This  
85 computational model enabled us to virtually screen several thousand compounds and  
86 identify three active compounds: tilorone, quinacrine and pyronaridine (22). All of these  
87 molecules inhibited EBOV in HeLa cells but not Vero cells, and they all demonstrated  
88 significant *in vivo* activity in the mouse-adapted EBOV (ma-EBOV) efficacy model (23-

89 25). Pyronaridine (EC<sub>50</sub> range of 420 nM-1.14 μM (22, 26)) has been previously  
90 described in detail (27). It is the major component of the EU-approved antimalarial  
91 Pyramax, which is a combination antimalarial therapy with artesunate and pyronaridine  
92 and is approved for this use in the Democratic Republic of the Congo as well as other  
93 countries (e.g. South Korea). Our recent assessment of pyronaridine treated ma-EBOV-  
94 infected mice in range-finding studies indicated that a single 75 mg/kg i.p. dose which  
95 when given 1hr after infection resulted in 100% survival and statistically significantly  
96 reduced viremia on study day 3 (25). Additional studies in ma-EBOV-infected mice  
97 demonstrated that we could dose pyronaridine (75 mg/kg) 2 or 24hrs post-exposure  
98 without affecting survival (25). This was mirrored in our previous tilorone EBOV mouse  
99 study with treatment doses at 30 mg/kg q.d. (23). The pyronaridine mouse efficacy  
100 study also provided preliminary insights into how pyronaridine may possess antiviral  
101 activity as cytokine and chemokine panels suggested immunomodulatory actions during  
102 an EBOV infection (25). Our recent follow- up studies with the structurally related  
103 quinacrine (24) indicated this and many other structurally related antimalarials are active  
104 against EBOV *in vitro* (25) and may have a similar mechanism of action as all are  
105 known or suspected to be lysosomotropic amines. Such lysosomotropic compounds can  
106 diffuse across the membranes of acidic cytoplasmic organelles in their unprotonated  
107 form, then become protonated in the acidic environment, causing substantial  
108 accumulation in these organelles (28), which has the potential to ultimately impact  
109 lysosomal function.

110

111 It should be pointed out that there are many FDA approved drugs for which the  
112 mechanism is unknown. It is only in recent years that we have started to unravel the  
113 mechanism of action of such drugs that were approved decades ago (29, 30). The focus  
114 of our current efforts is on assessing pyronaridine and other clinical stage compounds  
115 as possible treatments for EBOV. Our studies to date with tilorone, quinacrine and  
116 pyronaridine may also provide compounds which could be combined as EBOV  
117 therapies for future assessment. While the focus of this study is testing pyronaridine,  
118 tilorone was also evaluated alongside favipiravir in the guinea pig model of EBOV  
119 infection to assess whether the efficacy observed in mouse would also be observed in  
120 this species. *In vivo* studies in the guinea pig would if successful then lead the way for  
121 studies in non-human primates.

122

## 123 **Results**

124 **Testing vs EBOV and MARV strains.** Pyronaridine, tilorone, and quinacrine  
125 were all previously discovered using machine learning models for EBOV and tested  
126 against the Mayinga strain (22). We now demonstrate that they block the entry stage of  
127 infection in a pseudotype assay (Fig. S1). Even though EBOV and MARV are distantly  
128 related (31) we also now show these three compounds are active against MARV  
129 Musoke strain in HeLa Cells (Fig. S2). These compounds were found by two of our  
130 groups to be similarly efficacious against multiple EBOV (Kikwit, Mayinga and Makona)  
131 and MARV (Musoke and Angola) (Fig. 1 and Table 1) strains in HeLa cells.

132

133           **Metabolic stability across species.** We have previously characterized the *in*  
134 *vitro* metabolic stability of pyronaridine in mouse, guinea pig, non-human primate and  
135 human (25). We have now performed a comparison for tilorone, quinacrine and  
136 chloroquine (a known lysosomotropic compound (32)) under similar conditions.  
137 Pyronaridine liver microsome (LM) metabolic stability increased in the order of guinea  
138 pig, non-human primate, human and then mouse. Tilorone had a similar species-LM  
139 stability relationship, with an increase in the order of guinea pig, non-human primate,  
140 mouse, followed by human. Chloroquine differed, with LM metabolic stability in the order  
141 of mouse, non-human primate, guinea pig and then human. Finally, quinacrine  
142 metabolic stability increased in the order of non-human primate, mouse, guinea pig and  
143 then human (Table 2). The CYP2D6 substrate probe dextromethorphan metabolism  
144 closely paralleled the species differences observed for pyronaridine and was also used  
145 to normalize the  $t_{1/2}$  (Table S1 and S2).

146

147           **Metabolite identification across species.** We have previously characterized  
148 the pyronaridine metabolites produced in mouse microsomes (25). We have now  
149 evaluated the metabolites of multiple compounds with *in vitro* activity against EBOV  
150 (pyronaridine, tilorone, quinacrine and chloroquine) across multiple species (human and  
151 guinea pig) (Fig. S3-S6). The relative peak area abundance (%) for pyronaridine mono-  
152 oxygenation was much higher in guinea pig as compared to human liver microsomes.  
153 Tilorone *N*-deethylation and mono-oxygenation was higher in guinea pig relative to both  
154 mouse and human. Quinacrine *O*-demethylation was also 2-3 times higher in guinea  
155 pig. In contrast, chloroquine mono-oxygenation was highest in mouse relative to other



156 species. Overall, guinea pig metabolism for these compounds in LMs differed  
157 substantially as compared to the other species tested.

158

159 **Guinea pig dose range-finding toxicity.** The maximum tolerated dose of  
160 pyronaridine was evaluated in Hartley guinea pigs (Fig. 2). In the pyronaridine i.p.-  
161 dosed groups the highest dose level of 300 mg/kg was acutely toxic, with 4 of 6 guinea  
162 pigs found dead within 30 mins post injection. In addition, one died on day 7 and  
163 surprisingly the final surviving guinea pig showed no abnormal clinical observations. For  
164 the 200 mg/kg i.p.-dosed guinea pigs, 2 of 6 were found dead on days 5 and 6 and one  
165 met criteria for euthanasia on day 6. The remaining surviving guinea pigs from this  
166 group were found prostrate on day 7 (Fig. 2D). No abnormal clinical observations were  
167 noted for guinea pigs administered either 125 mg/kg pyronaridine or vehicle via i.p.  
168 administration for the duration of the study. Oral dosing however had drastically  
169 reduced toxicity, with only 1 of 6 having any abnormal clinical observations at 600  
170 mg/kg, which was detected directly following administration. This animal was found  
171 breathing rapidly for 6 mins, but fully recovered 2 hr post dose. There were no abnormal  
172 clinical observations at 300 or 125 mg/kg via oral administration. Based on these  
173 results, the maximum tolerated dose (MTD) for a single pyronaridine dose was  
174 determined as 125 and >600 mg/kg for i.p. and oral administration, respectively (Fig.  
175 2A). Additionally, the maximum tolerated dose of tilorone was also tested in guinea pigs  
176 (Supplemental Methods, Supplemental results, Fig. S7A).

177

178           **Guinea pig pharmacokinetics evaluation of pyronaridine.** The  
179 pharmacokinetics of pyronaridine was evaluated in Hartley guinea pigs (Fig. 2C, F).  
180 After an initial rapid absorption phase, the pyronaridine plasma profile exhibited a  
181 distribution phase at about 1hr, then a prolonged phase with plasma drug  
182 concentrations remaining essentially unchanged, or slightly higher until about 72hrs. All  
183 samples for animals dosed orally and i.p. contained measurable levels of pyronaridine  
184 though 336 and 168 hrs, respectively (LLOQ = 1 ng/ml). The plasma drug levels were  
185 analyzed using noncompartmental modeling allowing for the calculation of  
186 pharmacokinetic parameters (Table 3). Pyronaridine plasma levels reached the peak in  
187 the first sample, taken at 1 hr post administration. The elimination-phase  $t_{1/2}$  was  
188 calculated as 72.7 and 90.5 hrs for i.p. and oral administration, respectively. This is  
189 considerably shorter than the  $t_{1/2}$  found in humans and mice of between 195-251 hrs  
190 (33, 34) and 146 hrs (25), respectively. Maximum concentration of unbound drug in  
191 plasma ( $C_{max}$ ), area under the concentration-time curve from time zero to the last  
192 measurable concentration ( $AUC_{last}$ ), and area under the concentration-time curve from  
193 time zero to infinity ( $AUC_{inf}$ ) are provided in Table 3. Additionally, the pharmacokinetics  
194 of tilorone was also evaluated in guinea pigs (Supplemental Methods, Supplemental  
195 results, Fig. S7B, C and S8).

196

197           **Pyronaridine efficacy and clinical observations.** The efficacy of pyronaridine  
198 was evaluated in Hartley guinea pigs challenged with guinea pig adapted EBOV (gpa-  
199 EBOV). All animals in vehicle treatment (Group 1) succumbed to disease by study day  
200 12 (100% mortality). Group 2 (pyronaridine 300 mg/kg) and Group 3 (pyronaridine 600

201 mg/kg) resulted in 40% and 33% survival, respectively. Among the 16 animals in the  
202 combined Group 4 (favipiravir 300 mg/kg), 7 GPs survived through the end of the 21-  
203 day study period; the other 9 guinea pigs succumbed to disease by study day 14  
204 (43.75% survival, Fig. 3A). It should be noted that an animal in Group 2 was euthanized  
205 due to a clinical score of 4 on study day 2. Ebola disease in guinea pigs does not  
206 progress this rapidly so it is unlikely the animal succumbed to disease and it is more  
207 likely the animal incurred esophageal trauma because of the oral gavage technique,  
208 therefore this animal has been removed from data analysis.

209

210 Body weight results for each treatment group are summarized in Fig. 3B. Animals in  
211 Group 1 maintained body weight through study day 7 but decreased by study day 10,  
212 when all animals succumbed to disease. Group 2 animals body weight continuously  
213 decreased through study day 7, with surviving animals returning to pre-challenge body  
214 weights by study day 10. Group 3 animals dropped body weight following challenge,  
215 but the survivors reverted to pre-challenge body weight by the end of the 21-day study.  
216 It should be noted that an animal in this group had developed clinical signs late and  
217 succumbed to infection on study day 17. Animals in Group 4 remained at a consistent  
218 body weight until study day 10 where the mean body weight began to decrease briefly,  
219 but the surviving animals rebounded to pre-challenge weight by study day 13.

220

221 Plaque assay results from serum samples taken from animals that met euthanasia  
222 criteria during the scheduled observation times from all four groups are presented in

223 Fig. 3D. Only 10 of the 20 terminal samples had detectable levels of viable gpa-EBOV:  
224 eight animals from Group 1 ( $4.87 \times 10^7$  geometric mean PFU/mL) and two animals from  
225 Group 2 ( $8.15 \times 10^5$  geometric mean PFU/mL). Interestingly, all the guinea pigs treated  
226 with favipiravir were below the limit of detection for the plaque assay (Fig. S9).

227

228 Clinical scoring results for each guinea pig was assessed on a scale ranging from 1-4,  
229 where a score of 1 indicated a healthy animal and a score of 4 was indicative of a  
230 moribund animal. All animals in each group succumbed at least partially to disease by  
231 study day 8 (Fig. 3A). In each group the mean clinical observation increased inversely  
232 with survival, with each pyronaridine-treated group having two independent increases in  
233 average clinical observations. Interestingly, during post-study day 8 the average clinical  
234 score in the favipiravir group seemed to be independent of survival (Fig. 3C).

235

236 **Favipiravir and Pyronaridine *in vivo* efficacy against EBOV.** It should be  
237 noted that in order to increase the statistical power of our study we combined the  
238 favipiravir, positive-control data from our two individual experiments (n=6, n=10) as  
239 these used comparable approaches and were performed by the same group. Due to the  
240 small group sizes the data for the negative, vehicle controls (n=6, n=10) were also  
241 combined with the noted caveat of a variation in frequency of administration.

242

243 Favipiravir has been shown to protect guinea pigs from adapted Sudan Virus (35)  
244 however in our study it protected ~44% of the animals against gpa-EBOV, with deaths

245 starting on study day 6 and continuing until study day 14 (Fig. 3A). These were not  
246 statistically different from the treatment with pyronaridine 300 and 600 mg/kg with 40%  
247 and 33% survival, respectively (Log-rank (Mantel-Cox) test). Tilorone at the doses  
248 assessed were either comparable or had significantly reduced survival rates as  
249 compared to the vehicle (Fig. S9A). In summary, there was a statistically significant  
250 difference for both pyronaridine (300 mg/kg) and favipiravir when compared to the  
251 control combined from our two studies (Fig. 3).

252

253 The results in guinea pig are surprising as previous studies in mouse have shown  
254 pyronaridine, tilorone and favipiravir all protect mice infected with ma-EBOV (24, 25,  
255 36). Interestingly, virus was only detected in serum samples collected at the time of  
256 euthanasia from one and two Guinea pigs from the vehicle and pyronaridine 300 mg/kg,  
257 respectively, in the current pyronaridine study. This differed in our tilorone study  
258 (Supplemental Methods, Supplemental Results, Fig. S7-S9) where virus was recovered  
259 from all but one serum sample harvested from the guinea pigs in the vehicle and  
260 tilorone-treated groups (Fig. S9D). Virus was not detected in guinea pigs treated with  
261 favipiravir (both survivors and non-survivors) and was statistically significantly reduced  
262 from vehicle (Fig. 3D).

263

## 264 **Discussion**

265 There have been very few small molecule drugs that have reached the clinic for  
266 testing against EBOV, including favipiravir (37), GS-5734 (remdesivir) (17) and

267 galidesivir (17). Favipiravir has demonstrated 100% efficacy in the mouse model of  
268 EBOV (38, 39), 83% protection in the Interferon  $\alpha/\beta$  and  $\gamma$  Double Knockout Mice  
269 mouse model (40), 17% (41) to 50% (42) survival in the cynomolgous macaque and  
270 increased survival and decreased viral load (43) or unclear efficacy in humans (15, 16).  
271 Once daily IV dosed remdesivir has demonstrated 100% survival in non-human  
272 primates only (44) and on this basis has been tested in humans during the current  
273 EBOV outbreak. Recently, a significant portion of data was described (499 individuals)  
274 from a clinical trial involving the investigation of multiple therapeutics against EBOV  
275 (NCT03719586) with ZMapp (a monoclonal antibody cocktail) (45)), remdesivir,  
276 MAb114 (a monoclonal antibody) (46)) and REGN-EB3 (monoclonal antibody  
277 combination) (47)). These results showed that the antibodies REGN-EB3 and mAb114  
278 had overall survival rates of 71% and 66%, respectively, and were much more effective  
279 with patients with low viremia levels. Both ZMapp and remdesivir were shown to be less  
280 effective with a 51% and 47% survival rates, respectively (19). Ebola generally has a  
281 wide variation in its fatality rates of between 25% to 90%, (average ~50%). While these  
282 results are promising for the monoclonal antibodies, the delivery and administration of  
283 likely temperature sensitive treatments to remote areas in Africa is a potential issue. A  
284 highly stable small molecule drug that could be given orally as a single dose would be  
285 ideal and alleviate some of these logistical challenges that constitute the critical final  
286 stage of delivering a therapeutic to the patient.

287

288 From this present study, pyronaridine and several other drugs which we have identified  
289 have shown activity in several strains of EBOV and MARV *in vitro* (Fig. 1 and Table 1),

290 indicating they may have a broad-spectrum activity against the virus family *Filoviridae*.  
291 Based on our pseudovirus data these would appear to be preventing entry of the virus  
292 (Fig. 1). Two of these drugs were studied further in the guinea pig model of EBOV  
293 infection. It is apparent that pyronaridine did not show as substantial of a difference in  
294 the survival rate in guinea pig as was observed for mouse (100% survival) (25). This  
295 may be because the half-life for pyronaridine is much shorter in the guinea pig, so  
296 efficacious plasma levels of drug are likely not maintained long enough (90 hrs). The  
297 pharmacokinetics varies in other species, where the half-life in mice and humans is  
298 approximately 140 hrs and 200 hrs, respectively. Many other small molecules have  
299 failed to progress beyond guinea pig for EBOV due to a lack of significant efficacy (7,  
300 48-51). While antibodies have been successfully used in this animal model (52, 53),  
301 these failures may represent a significant limitation of the guinea pig model to  
302 extrapolate small-molecule efficacy against EBOV in humans. We have demonstrated  
303 there are substantial metabolic stability differences between mouse, non-human  
304 primate, human and guinea pig (25), with the latter having a considerably lower  
305 metabolic stability for pyronaridine (Table 2). This could be one explanation of why  
306 several drugs for EBOV perform well in mouse but fail in the guinea pig. While to our  
307 knowledge this has not been determined for favipiravir, it has been shown that the  
308 pharmacokinetics of this compound exhibit nonlinearity over dose and time in non-  
309 human primates (54), making these interspecies' comparisons potentially much more  
310 complex. Based on this *in vitro* data it would also suggest the metabolic stability of  
311 pyronaridine in the non-human primate may also be poor, requiring a dose adjustment  
312 to retain efficacy in this model. Antibody therapeutics for EBOV are not likely to be

313 metabolized by the same drug metabolizing enzymes; therefore, they may show more  
314 universal efficacy across species. We have also evaluated the metabolism of several  
315 drugs of interest in liver microsomes of various species under similar conditions (Table  
316 2). The structurally unrelated tilorone also appears to have limited metabolic stability in  
317 guinea pig and is much more stable in non-human primate and human liver  
318 microsomes. Chloroquine and quinacrine show different patterns across species. Our  
319 comparison of metabolic stability with the substrate probe dextromethorphan may also  
320 point to the role of CYP2D family in the metabolism of pyronaridine. It has previously  
321 been shown that pyronaridine inhibits known substrates of CYP2D6 both *in vitro* (25)  
322 and *in vivo* (55), also suggesting that it may be a CYP2D6 substrate as well. We have  
323 supplemented these data with detailed metabolite identification for each of these four  
324 compounds available for the first time (Figure S3-6). It is unclear what effect EBOV  
325 infection would have on the metabolic enzymes such as the P450's in the guinea pig.  
326 To our knowledge, favipiravir has not previously been tested orally against EBOV in  
327 guinea pig (though it has demonstrated survival rates of 83-100% in Sudan virus-  
328 infected guinea pigs (35)), and in this study we now demonstrate efficacy on a par with  
329 what was observed in non-human primates (41, 42). In comparison, survival after  
330 pyronaridine (300 and 600 mg/kg) treatment was not significantly different from oral-  
331 administered favipiravir in the guinea pig model ((Log-rank (Mantel-Cox) test),  
332 suggesting a similar efficacy. There was a statistically significant difference for both  
333 pyronaridine (300 mg/kg) and favipiravir when compared to the control combined from  
334 our two studies (Fig. 3). Our initial dose ranging work showed significant toxicity with  
335 pyronaridine when dosed i.p. in guinea pig (accumulation in the abdominal cavity)



336 hence the focus on oral administration in this study. It should be noted that we used  
337 only a single dose of pyronaridine for all our efficacy studies, and it is feasible that more  
338 frequent dosing to overcome the lower half life may result in a higher exposure and  
339 subsequent increased survival rate.

340

341 Developing small molecule drugs for EBOV is extremely challenging. While high  
342 throughput screens have readily identified many FDA approved drugs as well as other  
343 candidate molecules with *in vitro* inhibitory activities against EBOV (20, 56), when these  
344 compounds are tested in guinea pig, to date, all of them have failed. For example,  
345 chloroquine (7, 48), azithromycin (7), amiodarone (49), iminosugars (50), BGB324 (51),  
346 NCK8 (51) and 17-DMAG (51) were all inactive in the guinea pig *in vivo* model.  
347 Interestingly, tilorone (57), chloroquine (32), azithromycin (58), amiodarone (59),  
348 BGB324 (60) and 17-DMAG (61) are all known lysosomotropic compounds and NCK8  
349 is most likely as well (62). This may indicate that these compounds could have also  
350 failed due to a common antiviral mechanism that does not transcend species. In  
351 addition, there is recent evidence that the type-I IFN antiviral immune response in  
352 guinea pig is significantly different than in mouse or non-human primate (63), therefore  
353 guinea pig may not be an appropriate model to universally predict the antiviral response  
354 in humans. This is particularly relevant to EBOV, since viral susceptibility and  
355 adaptation to guinea pig was directly linked to differences in the immune response (64).

356

357 In total, these results for pyronaridine, tilorone and favipiravir may question the need for  
358 demonstrating efficacy against gpa-EBOV before expanding to the non-human primate  
359 model of Ebola virus infection. They also suggest that larger group sizes are required to  
360 show statistical significance and to allow for spontaneous animal deaths due to issues  
361 with oral gavage, which ultimately reduces animal group sizes.

362

363 In conclusion, the guinea pig *in vivo* data collected in this study points to ~40% survival  
364 for pyronaridine and favipiravir against gpa-EBOV. The accumulated *in vitro* metabolic  
365 data indicates that the guinea pig may be a suboptimal model to predict the efficacy of  
366 these compounds to combat EBOV. This could be due to differences in EBOV  
367 mechanism and drug metabolism (e.g. species differences in the metabolic enzymes  
368 involved (65, 66)). Our combined *in vitro* and *in vivo* studies with pyronaridine  
369 demonstrate its potential utility for repurposing as an antiviral against different strains of  
370 EBOV and MARV. These efforts also provide ample justification for future testing of  
371 pyronaridine efficacy in non-human primates and possible provision of the combination  
372 drug Pyramax for future Ebola outbreaks.

373

374

## 375 **MATERIALS AND METHODS**

376 **Ethics statement.** All work with gpEBOV-challenged guinea pigs was approved  
377 by the University of Texas Medical Branch's IACUC (IACUC protocol number 1805041  
378 approved 5<sup>th</sup> June 2018) and was done in accordance with all applicable sections of the

379 Final Rules of the Animal Welfare Act regulations (9 CFR Parts 1, 2, and 3) and *Guide*  
380 *for the Care and Use of Laboratory Animals: Eighth Edition* (Institute of Laboratory  
381 Animal Resources, National Academies Press, 2011; the *Guide*). This work was  
382 conducted in UTMB's AAALAC (Association for the Assessment and Accreditation of  
383 Laboratory Animal Care)-accredited GNL BSL4 laboratory.

384

385 **Chemicals and reagents.** Pyronaridine tetraphosphate [4-[(7-Chloro-2-  
386 methoxybenzo[b][1,5]naphthyridin-10-yl)amino]-2,6-bis(1-pyrrolidinylmethyl)phenol  
387 phosphate (1:4)] (22) was purchased from BOC Sciences (Shirley NY). Favipiravir was  
388 purchased from AdooQ Bioscience (Irvine, CA). Tilorone and pyronaridine was  
389 purchased from BOC Sciences. Quinacrine and Chloroquine were purchased from  
390 Cayman Chemicals (Ann Arbor, Michigan) and Sigma Aldrich (St. Louis, MO),  
391 respectively.

392

393 ***In Vitro* ADME assays.** *In vitro* ADME studies were performed by BioDuro (San  
394 Diego, CA).

395

396 ***In Vitro* liver microsome stability assays.** The liver microsome solution (197.5  
397  $\mu$ L, 0.5 mg/ml protein concentration) (Sekisui Xenotech, Kansas City, KS) was aliquoted  
398 into 1.1 ml tubes, to which 2.5  $\mu$ L of positive control and test compound stock solutions  
399 (100  $\mu$ M in DMSO) were added. The tubes were vortexed gently, pre-incubated for 5  
400 min at 37°C, then 50  $\mu$ L of 5 mM NADPH or LM buffer (no NADPH buffer) was added

401 into the tubes. For analysis, an aliquot of 30  $\mu$ L was removed from each tube at 0, 5, 15,  
402 30 and 60 min (without-NADPH reaction:0 and 60 min) and quenched with 300  $\mu$ L of  
403 5/10 ng/ml terfenadine/tolbutamide in methanol/acetonitrile (1:1, v/v). Samples were  
404 vigorously vortexed for 1 min and then centrifuged at 4,000 rpm for 15 min at 4°C. 100  
405  $\mu$ L of supernatant from each sample was transferred to tubes for LCMS analysis. The  
406 amount of parent compound was determined on the basis of the peak area ratio  
407 (compound area to IS area) for each time point (AB SCIEX 4500). Clearance rates were  
408 calculated by the equation:  $t_{1/2} = \ln(2)/k_e$  and in vitro  $CL_{int}$  ( $\mu$ L/min/mg protein) =  
409  $k_e \cdot \text{Incubation volume} / \text{Microsomal protein amount}$ , and  $k_e$  using equation of 1st order  
410 kinetics :

411

412 ***In Vitro* Metabolite Identification of pyronaridine, quinacrine, chloroquine**  
413 **and tilorone in human, mouse, guinea pig liver microsomes.** A DMSO solution of  
414 test compound was spiked into 50 mM  $\text{KH}_2\text{PO}_4$  (pH 7.4) buffer containing liver  
415 microsome at a concentration of 1 mg/mL (Sekisui Xenotech, Kansas City, KS). The  
416 reaction was initiated by the addition of 1.0 mM NADPH to the reaction mixture. The  
417 final concentration of the test compound was 1  $\mu$ M. After 0 min and 60 min incubation  
418 at 37°C, an aliquot was removed and the sample were precipitated with a 1:6  
419 acetonitrile, quenching the reaction. The resulting mixture was centrifuged, and the  
420 resultant supernatants were dried at  $\text{N}_2$  stream, the resultant residue were reconstituted  
421 with 300  $\mu$ L 10% acetonitrile/ $\text{H}_2\text{O}$  (v/v) (0.1% FA) before LC-MS/MS analysis. The  
422 supernatant was used for LC-MS/MS analysis. All separations were performed on a  
423 ACQUITY UPLC BEH T3 1.8  $\mu$ m column (2.1 $\times$ 100 mm) at 25°C with a flow rate of 0.3

424 mL/min. Mobile phase A consisted of 0.1% formic acid in water and mobile phase B  
425 consisted of 0.1% formic acid in acetonitrile. Chromatography used a step gradient by  
426 maintaining 1% mobile phase B for 5 min, 10% mobile phase B over 8.0 minutes, 20%  
427 mobile phase B over 2.0 min, 90% mobile phase B over 2 minutes, 95% mobile phase B  
428 over 2 minutes, then re-equilibration back to 1% B at 20 minutes. The total run time  
429 was 22 minutes. For all samples, a 5 µL aliquot of sample was injected. The mass  
430 spectrometer (HRMS, Q-Exactive Plus from Thermo Fisher) was operated in high-  
431 resolution, accurate-mass (HRAM) Orbitrap detection mode.

432

433 **Test article preparation for *In Vivo* studies.** Vehicle Preparation (Pyronardine  
434 study): A solution of 20% Kolliphor HS 15 with Water for injection (WFI) was made to be  
435 used for the vehicle. Kolliphor HS 15 was melted at 60 °C. 10 ml of Kolliphor HS 15 was  
436 combined with WFI to a final solution volume of 50.0 ml (20% solution) and mixed using  
437 a vortex mixer for 30 seconds and then sonicated in an ultrasonic water bath for 25  
438 minutes at 45°C. Test Article Dose Preparation: Dose formulations were prepared by  
439 mixing the pyronaridine in the vehicle to achieve the target concentration. The  
440 formulation was mixed by inversion 5-6 times and placed on an orbital shaker for 30±5  
441 min. Favipiravir Preparation: A 0.5% solution of methylcellulose was prepared in sterile  
442 water. To this, the appropriate amount of Favipiravir was added, and the pH adjusted  
443 until the compound goes into solution. Favipiravir was prepared prior to challenge and  
444 stored at 4-8 °C.

445

446 **Guinea pig *in vivo* dose range-finding toxicity for pyronaridine.** To assess  
447 the tolerance of pyronaridine and to select dose groups for pharmacokinetics studies,  
448 the drug was given to 5-6-week-old male and female Hartley guinea pigs (Vital River  
449 Laboratories) as a single dose by intraperitoneal (i.p.) administration or oral gavage  
450 (PO). The compound was formulated in 20% Kolliphor HS 15 (Solutol) in sterile water.  
451 There were 8 groups in total (i.p. and oral control groups), with 6 animals per group (3  
452 male, 3 female). I.p. administration was 125, 200 and 300 mg/kg and oral was 125, 300  
453 and 600 mg/kg, each with a dosing volume of 5 ml/kg. Clinical observations were  
454 initiated immediately post-dose and once daily up to 168 hrs post-dose.

455  
456 **Guinea pig *in vivo* pharmacokinetics evaluation of pyronaridine.** Guided by  
457 the dose range-finding study, the pharmacokinetics of pyronaridine in guinea pigs were  
458 initially assessed at 125 and 600 mg/kg (n=3; male) for i.p. and oral administration,  
459 respectively, concentrations at or below the MTD determined by the 7-day study.  
460 Pyronaridine for both oral and i.p. administration was solubilized in the same vehicle  
461 (20% Kolliphor HS 15). Blood was collected from the treated Guinea pigs at at 1, 4, 8,  
462 24, 72, 168, 264 and 336 hrs post-dose for processing of plasma. All samples were  
463 analyzed, and drug levels were measured by liquid chromatography-tandem mass  
464 spectrometry (LC-MS/MS) with a lower limit of quantitation (LLOQ) of 1.0 ng/mL.  
465 Notably, in the pyronaridine i.p. dosed, 125 mg/ml group 2 of 3 Guinea pigs were found  
466 dead on days 14 and 17 post dose.

467

468           **Virus strains.** For *in vivo* experiments, a well-characterized guinea pig-adapted  
469 Ebola virus stock (Ebola virus *Cavia porcellus*/ COD/1976/Mayinga-CDC-808012  
470 (gpaEBOV)) was used for all efficacy studies (67). All work involving infectious gpa-  
471 EBOV was performed at the Galveston National Laboratory (GNL) biosafety level (BSL)  
472 4 laboratory, registered with the Centers for Disease Control and Prevention Select  
473 Agent Program for the possession and use of biological select agents.

474

475           **Initial cell-based testing for inhibition against wild type MARV strain.** MARV  
476 expressing GFP was used in testing against viral inhibition as outlined previously (31).  
477 In short, inhibitors were tested at 8 concentrations for activity. All treatments were done  
478 in duplicates, each replicate being on a different plate. Briefly, 4,000 HeLa cells  
479 (Ambion, Austin, TX) per well in 25  $\mu$ l of medium were grown overnight in 384-well  
480 tissue culture plates. On the day of assay, test compounds were diluted to 200  $\mu$ M  
481 concentration in complete medium. 25  $\mu$ l of this mixture was added to the cells already  
482 containing 25  $\mu$ l medium to achieve a concentration of 100  $\mu$ M. 25  $\mu$ l of medium was  
483 removed from the first wells and added to next well. This type of serial dilution was done  
484 8 times to achieve concentrations of 100, 50, 25, 12.50, 6.25, 3.12, 1.56 and 0.78  $\mu$ M.  
485 One hour after incubating with the compound 25  $\mu$ l of infection mix containing wild type  
486 virus was used to infect cells. This resulted in a final concentration of 50, 25, 12.50,  
487 6.25, 3.12, 1.56, 0.78 and 0.39  $\mu$ M. Bafilomycin at final a concentration of 10 nM was  
488 used as a positive control drug. All virus infections were done in a BSL-4 lab to achieve  
489 a MOI of 0.075 to 0.15. Cells were incubated with virus for 24 hours. One day post  
490 infection cells were fixed by immersing the plates in formalin overnight at 4°C. Fixed

491 plates were decontaminated and brought out of the BSL-4. Formalin from fixed plates  
492 was decanted and plates were washed thrice with PBS. MARV infected plates were  
493 immuno-stained using virus specific antibodies. Nuclei were stained using Hoechst at  
494 1:50,000 dilutions. Plates were imaged and nuclei and infected cells were counted using  
495 Cell Profiler software.

496

497 Cells were permeabilized using 0.1% Triton X-100 (Sigma, Cat#T8787) in PBS and  
498 blocked for 1 h in 3.5% bovine serum albumin (Fisher-scientific- Cat#BP9704100),  
499 followed by immunostaining. Fixed cells were incubated with an anti-MARV VLP  
500 antibody (IBT bioservices, Cat#04-0005, 1:1500 dilution), overnight at 4°C. After 2  
501 washes to remove any excess antibody cells were stained with anti-Rabbit Alexa-546  
502 antibody (Life technologies, Cat#A11035). After 3 washes to remove any non-specific  
503 antibody nuclei were stained using Hoechst at 1:50,000 dilution and imaged on a Nikon  
504 Ti Eclipse automated microscope. Nuclei and infected cells were counted using  
505 CellProfiler software. Relative infection compared to untreated controls was plotted in  
506 GraphPad prism 8.2.1 software.

507

508 **Follow-up cell-based testing against EBOV and MARV strains.** Compounds  
509 were tested in vitro against 3 strains of Ebola virus (Kikwit, Makona, Mayinga) and 2  
510 strains of MARV (Angola, Musoke): Ebola virus/H.sapiens-tc/GIN/2014/Makona-C05  
511 (EBOV/Mak, GenBank accession no. KX000398.1), Ebola virus/H.sapiens-  
512 tc/COD/1995/Kikwit-9510621 (EBOV/Kik, GenBank accession no. KU182905.1); Ebola



513 virus/H.sapiens-tc/COD/1976/Yambuku-Mayinga (EBOV/May, GenBank accession no.  
514 KY425649.1); Marburg virus/H.sapiens-tc/AGO/2005/Ang-1379v (MARV/Ang,  
515 BioSample accession no. SAMN05916381); Marburg virus/H.sapiens-tc/KEN/1980/Mt.  
516 Elgon-Musoke (MARV/Mus, GenBank accession no. DQ217792). All virus stocks were  
517 propagated, and titers were determined by plaque assay on Vero E6 cells obtained from  
518 the American Type Culture Collection (Manassas, VA) as previously described (68).

519

520 The *in vitro* infection inhibition of the all the above filovirus strains was performed in  
521 HeLa cells. HeLa cells were seeded at  $3 \times 10^4$  cells/well in 96-well plates. After 24  
522 hours (h), cells were treated with drugs at 2-fold dilutions starting from 30  $\mu$ M. Cells  
523 were infected with virus 1 hr after the addition of the drugs in BSL4-containment at a  
524 multiplicity of infection (MOI) of 0.21 or 0.4. After 48 h, plates were fixed and virus was  
525 detected with a mouse antibody specific for EBOV VP40 protein (#B-MD04-BD07-AE11,  
526 made by US Army Medical Research Institute of Infectious Diseases, Frederick MD  
527 under Centers for Disease Control and Prevention contract) (68) or MARV VP40 protein  
528 (Cat# IBT0203-012, IBT Bioservices, Rockville, MD) followed by staining with anti-  
529 mouse IgG-peroxidase labeled antibody (KPL, Gaithersburg, MD, #074-1802).  
530 Luminescence was read on an Infinite® M1000 Pro plate reader (Tecan US, Morrisville,  
531 NC). The signal of treated, infected wells was normalized to uninfected control wells and  
532 measured (in percent) relative to untreated infected wells. Non-linear regression  
533 analysis was performed, and the 50% inhibitory concentrations ( $EC_{50}$ s) were calculated  
534 from fitted curves (log [agonist] versus response [variable slope] with constraint to  
535 remain above 0%) (GraphPad Software, La Jolla, CA). Error bars of dose-response

536 curves represent the standard deviation of three replicates. For quantitation of drug  
537 toxicity, HeLa cells were mock infected (no virus) and treated with drug dilutions under  
538 the same conditions as the infected cells. After 48 h, cell viability was measured using  
539 the CellTiter Glo Luminescent Cell Viability Assay kit according to manufacturer's  
540 protocol (Promega, Madison, WI).

541

542 **VSV-EBOV-GP pseudotype virus assay.** Vesicular Stomatitis Virus (VSV)  
543 pseudotyped with EBOV glycoprotein (GP) expressing a GFP reporter was generously  
544 provided by Dr. Wendy Maury (University of Iowa) and has been described previously  
545 (69, 70). VSV pseudotyped with EBOV glycoprotein was grown by infecting Vero cells  
546 (Ambion, Austin, TX) and then harvesting via filtration of the supernatant through 0.4  $\mu\text{M}$   
547 filters 24-30 hours after infection. Virus was then stored at -80 until use.

548 The cells were tested and imaged using the general methods outlined previously (31).  
549 In short, HeLa cells (Ambion, Austin, TX) were plated at a density of 20,000 cells/well of  
550 a 96 well plate. After attachment overnight, cells were pretreated with compounds for 1  
551 hr at predetermined doses. The dosing series in this case was 25, 12.5, 6.25, 3.12,  
552 1.56, 0.78, 0.39, 0.19, 0.09, 0.04, 0.02 and 0.01  $\mu\text{M}$ . After 1 hr of incubation with  
553 compounds, the cells were infected with VSV pseudotyped with EBOV glycoprotein and  
554 expressing a GFP reporter. 24 hours after infection, cells were fixed in formalin. After  
555 fixation, formalin was washed off, nuclei stained with Hoechst and the cells imaged.  
556 Green cells (infected) and blue nuclei (total number of cells) were counted using cell  
557 profiler. Relative infection compared to untreated controls was plotted in GraphPad  
558 prism 8.2.1 software.

559

560 ***In Vivo* efficacy clinical observations and scoring.** Twenty-four (24)

561 experimentally naïve Hartley guinea pigs were assigned to four (4) gender balanced

562 groups. Guinea pigs were anesthetized for dosing (challenge and treatment) via

563 isoflurane inhalation. On study day 0 (SD0) all guinea pigs were challenged with 1000

564 PFU of gpa-EBOV in 0.2 mL of Minimum Essential Medium (MEM) via intraperitoneal

565 (i.p.) injection. The viral dose administered was verified through plaque assay analysis

566 of the prepared virus suspension.

567

568 Dosing for all pyronaridine and all tilorone groups occurred via oral gavage of

569 test/control article on SD0 one hour ( $\pm$  15 minutes) post-challenge. Favipiravir (300

570 mg/kg) was given by oral gavage once daily from SD0 through SD7. For the

571 pyronaridine study on SD 3 and during unscheduled euthanasia blood was collected via

572 retro-orbital bleed. For the tilorone study, blood was collected during scheduled and

573 unscheduled euthanasia. Serum was harvested for viremia measurements via plaque

574 assay.

575

576 Following challenge, animals were monitored daily by visual examination. Clinical

577 scoring and health assessments were performed and documented at each observation

578 using the scoring system wherein: 1= Healthy; 2= Lethargic and ruffled fur, 3= Sore of 2

579 + hunched posture an orbital tightening, 4 = Score of 3 + reluctance to move when

580 stimulated, paralysis, unable to access feed and water normally or  $\geq$  20% body weight

581 loss. Body weights were measured daily during the dosing period (SD0 – SD7) and  
582 then every third day until the study was completed. When animals reached a clinical  
583 score of 2, the frequency of clinical observations increased to twice daily, 4-6 hours  
584 after the initial observation. When the disease progressed, and the clinical score  
585 increased to a 3, the frequency of observations was increased to three times daily. All  
586 surviving animals were humanely euthanized on Study Day 21.

587

588 **Viral load determination.** Serum was harvested from guinea pigs that met the  
589 euthanasia criteria. Serum harvested for plaque assay analysis was stored frozen (in an  
590 ultralow [i.e., -80°C] freezer) until the conclusion of the in-life portion of the animal study,  
591 after which samples were batch processed. For this assay, the limit of detection in this  
592 assay was 100 PFU/mL. For statistical analysis and graphing all values less than the  
593 LOD were assigned a value of one half the LOD.

594

## 595 **ACKNOWLEDGMENTS**

596 We gratefully acknowledge the team at Bioduro for their considerable efforts on this  
597 project and in particular Mr. Dan Contoit for whom we dedicate this article to his  
598 memory.

599 Dr. Joel S. Freundlich is kindly acknowledged for consultations. We acknowledge Elena  
600 Postnikova, Janie Liang, and Shuiqing Yu who performed the *in vitro* testing of  
601 compounds against multiple virus strains. Dr. Mupenzi Mumbere is kindly thanked for  
602 providing information on drug availability in the Democratic Republic of the Congo.

603 H.Z., J.D., and M.R.H performed this work as employees of Battelle Memorial Institute  
604 (BMI). The findings and conclusions in this report do not necessarily reflect the views or  
605 policies of the US Department of Health and Human Services or of the institutions and  
606 companies affiliated with the authors.

607

## 608 **FUNDING**

609 We kindly acknowledge NIH funding: R21TR001718 from NCATS (PI – Sean Ekins),  
610 NIAID CONTRACT NO.: HHSN272201700040I, NIAID TASK ORDER NO.:  
611 HHSN27200007 (PI - Peter Madrid). This work was supported by the Division of  
612 Intramural Research of the National Institute of Allergy and Infectious Diseases (NIAID);  
613 Integrated Research Facility (NIAID, Division of Clinical Research); Battelle Memorial  
614 Institute's prime contract with NIAID (Contract # HHSN272200700016I). H.Z., J.D., and  
615 M.R.H performed this work as employees of Battelle Memorial Institute (BMI). The  
616 findings and conclusions in this report do not necessarily reflect the views or policies of  
617 the US Department of Health and Human Services or of the institutions and companies  
618 affiliated with the authors.

619

## 620 **CONFLICTS OF INTEREST**

621 SE is CEO of Collaborations Pharmaceuticals, Inc. TRL is an employee at  
622 Collaborations Pharmaceuticals, Inc. Collaborations Pharmaceuticals, Inc. has  
623 obtained FDA orphan drug designations for pyronaridine, tilorone and quinacrine for use  
624 against Ebola.

625

626

627 **REFERENCES**

628 1. Hernandez HW, Soeung M, Zorn KM, Ashoura N, Mottin M, Andrade CH, Caffrey  
629 CR, de Siqueira-Neto JL, Ekins S. 2018. High Throughput and Computational  
630 Repurposing for Neglected Diseases. *Pharm Res* 36:27.

631 2. Ekins S, Williams AJ, Krasowski MD, Freundlich JS. 2011. In silico repositioning  
632 of approved drugs for rare and neglected diseases. *Drug Discov Today* 16:298-  
633 310.

634 3. Bai JPF, Hsu CW. 2019. Drug repurposing for Ebola virus disease: principles of  
635 consideration and the Animal Rule. *J Pharm Sci* 108:798-806.

636 4. Baker NC, Ekins S, Williams AJ, Tropsha A. 2018. A bibliometric review of drug  
637 repurposing. *Drug Discov Today* 23:661-672.

638 5. Bai JPF, Hsu CW. 2019. Drug Repurposing for Ebola Virus Disease: Principles of  
639 Consideration and the Animal Rule. *J Pharm Sci* 108:798-806.

640 6. Kouznetsova J, Sun W, Martinez-Romero C, Tawa G, Shinn P, Chen CZ,  
641 Schimmer A, Sanderson P, McKew JC, Zheng W, Garcia-Sastre A. 2014.  
642 Identification of 53 compounds that block Ebola virus-like particle entry via a  
643 repurposing screen of approved drugs. *Emerg Microbes Infect* 3:e84.

- 644 7. Madrid PB, Panchal RG, Warren TK, Shurtleff AC, Endsley AN, Green CE,  
645 Kolokoltsov A, Davey R, Manger ID, Gilfillan L, Bavari S, Tanga MJ. 2015.  
646 Evaluation of Ebola Virus Inhibitors for Drug Repurposing. *ACS Infect Dis* 1:317-  
647 26.
- 648 8. Kiley MP, Bowen ET, Eddy GA, Isaacson M, Johnson KM, McCormick JB,  
649 Murphy FA, Pattyn SR, Peters D, Prozesky OW, Regnery RL, Simpson DI,  
650 Slenczka W, Sureau P, van der Groen G, Webb PA, Wulff H. 1982. Filoviridae: a  
651 taxonomic home for Marburg and Ebola viruses? *Intervirology* 18:24-32.
- 652 9. Leligdowicz A, Fischer WA, 2nd, Uyeki TM, Fletcher TE, Adhikari NK, Portella G,  
653 Lamontagne F, Clement C, Jacob ST, Rubinson L, Vanderschuren A, Hajek J,  
654 Murthy S, Ferri M, Crozier I, Ibrahima E, Lamah MC, Schieffelin JS, Brett-Major  
655 D, Bausch DG, Shindo N, Chan AK, O'Dempsey T, Mishra S, Jacobs M, Dickson  
656 S, Lyon GM, 3rd, Fowler RA. 2016. Ebola virus disease and critical illness. *Crit*  
657 *Care* 20:217.
- 658 10. Formenty P, Libama F, Epelboin A, Allarangar Y, Leroy E, Moudzeo H,  
659 Tarangonia P, Molamou A, Lenzi M, Ait-Ikhlef K, Hewlett B, Roth C, Grein T.  
660 2003. [Outbreak of Ebola hemorrhagic fever in the Republic of the Congo, 2003:  
661 a new strategy?]. *Med Trop (Mars)* 63:291-5.
- 662 11. Ekins S, Southan C, Coffee M. 2015. Finding small molecules for the 'next  
663 Ebola'. *F1000Res* 4:58.

- 664 12. Bornholdt ZA, Herbert AS, Mire CE, He S, Cross RW, Wec AZ, Abelson DM,  
665 Geisbert JB, James RM, Rahim MN, Zhu W, Borisevich V, Banadyga L, Gunn  
666 BM, Agans KN, Wirchnianski AS, Goodwin E, Tierney K, Shestowsky WS,  
667 Bohorov O, Bohorova N, Velasco J, Ailor E, Kim D, Pauly MH, Whaley KJ, Alter  
668 G, Walker LM, Chandran K, Zeitlin L, Qiu X, Geisbert TW, Dye JM. 2019. A Two-  
669 Antibody Pan-Ebolavirus Cocktail Confers Broad Therapeutic Protection in  
670 Ferrets and Nonhuman Primates. *Cell Host Microbe* 25:49-58 e5.
- 671 13. Jonas O. 2019. Pandemic bonds: designed to fail in Ebola. *Nature* 572:285.
- 672 14. Ilunga Kalenga O, Moeti M, Sparrow A, Nguyen VK, Lucey D, Ghebreyesus TA.  
673 2019. The Ongoing Ebola Epidemic in the Democratic Republic of Congo, 2018-  
674 2019. *N Engl J Med* doi:10.1056/NEJMSr1904253.
- 675 15. Sissoko D, Laouenan C, Folkesson E, M'Lebing AB, Beavogui AH, Baize S,  
676 Camara AM, Maes P, Shepherd S, Danel C, Carazo S, Conde MN, Gala JL,  
677 Colin G, Savini H, Bore JA, Le Marcis F, Koundouno FR, Petitjean F, Lamah MC,  
678 Diederich S, Tounkara A, Poelart G, Berbain E, Dindart JM, Duraffour S, Lefevre  
679 A, Leno T, Peyrouset O, Irengé L, Bangoura N, Palich R, Hinzmann J, Kraus A,  
680 Barry TS, Berette S, Bongono A, Camara MS, Chanfreau Munoz V, Doumbouya  
681 L, Souley H, Kighoma PM, Koundouno FR, Rene L, Loua CM, Massala V,  
682 Moumouni K, Provost C, Samake N, Sekou C, et al. 2016. Experimental  
683 Treatment with Favipiravir for Ebola Virus Disease (the JIKI Trial): A Historically  
684 Controlled, Single-Arm Proof-of-Concept Trial in Guinea. *PLoS Med*  
685 13:e1001967.



- 686 16. Kerber R, Lorenz E, Duraffour S, Sissoko D, Rudolf M, Jaeger A, Cisse SD,  
687 Camara AM, Miranda O, Castro CM, Akoi Bore J, Raymond Koundouno F,  
688 Repits J, Afrough B, Becker-Ziaja B, Hinzmann J, Mertens M, Vitoriano I, Hugh  
689 Logue C, Bottcher JP, Pallasch E, Sachse A, Bah A, Cabeza-Cabrerizo M,  
690 Nitzsche K, Kuisma E, Michel J, Holm T, Zekeng EG, Cowley LA, Garcia-Dorival  
691 I, Hetzelt N, Baum JHJ, Portmann J, Carter L, Yenamaberhan RL, Camino A,  
692 Enkirch T, Singethan K, Meisel S, Mazzarelli A, Kosgei A, Kafetzopoulou L,  
693 Rickett NY, Patrono LV, Ghebreghiorghis L, Arnold U, Colin G, Juchet S, Marchal  
694 CL, et al. 2019. Laboratory Findings, Compassionate Use of Favipiravir, and  
695 Outcome in Patients With Ebola Virus Disease, Guinea, 2015-A Retrospective  
696 Observational Study. *J Infect Dis* 220:195-202.
- 697 17. Taylor R, Kotian P, Warren T, Panchal R, Bavari S, Julander J, Dobo S, Rose A,  
698 El-Kattan Y, Taubenheim B, Babu Y, Sheridan WP. 2016. BCX4430 - A broad-  
699 spectrum antiviral adenosine nucleoside analog under development for the  
700 treatment of Ebola virus disease. *J Infect Public Health* 9:220-6.
- 701 18. Lee JS, Adhikari NKJ, Kwon HY, Teo K, Siemieniuk R, Lamontagne F, Chan A,  
702 Mishra S, Murthy S, Kiiza P, Hajek J, Bah EI, Lamah MC, Kao R, Fowler RA.  
703 2019. Anti-Ebola therapy for patients with Ebola virus disease: a systematic  
704 review. *BMC Infect Dis* 19:376.
- 705 19. BBC. 2019. Ebola drugs show '90% survival rate' in breakthrough trial.  
706 <https://www.bbc.com/news/world-africa-49326505>. Accessed

- 707 20. Madrid PB, Chopra S, Manger ID, Gilfillan L, Keepers TR, Shurtleff AC, Green  
708 CE, Iyer LV, Dilks HH, Davey RA, Kolokoltsov AA, Carrion R, Jr., Patterson JL,  
709 Bavari S, Panchal RG, Warren TK, Wells JB, Moos WH, Burke RL, Tanga MJ.  
710 2013. A systematic screen of FDA-approved drugs for inhibitors of biological  
711 threat agents. PLoS One 8:e60579.
- 712 21. Madrid PB, Panchal RG, Warren TK, Shurtleff AC, Endsley AN, Green CE,  
713 Kolokoltsov AA, Davey RA, Manger ID, Gilfillan L, Bavari S, Tanga MJ. 2015.  
714 Evaluation of Ebola Virus Inhibitors for Drug Repurposing. ACS Inf Dis 1:317-  
715 326.
- 716 22. Ekins S, Freundlich J, Clark A, Anantpadma M, Davey R, Madrid P. 2015.  
717 Machine learning models identify molecules active against Ebola virus in vitro.  
718 F1000Res 4:1091.
- 719 23. Ekins S, Lingerfelt MA, Comer JE, Freiberg AN, Mirsalis JC, O'Loughlin K,  
720 Harutyunyan A, McFarlane C, Green CE, Madrid PB. 2018. Efficacy of Tilorone  
721 Dihydrochloride against Ebola Virus Infection. Antimicrob Agents Chemother  
722 62:e01711-17.
- 723 24. Lane TR, Comer JE, Freiberg AN, Madrid PB, Ekins S. 2019. Repurposing  
724 Quinacrine Against Ebola Virus Infection In vivo. Antimicrob Agents Chemother  
725 doi:10.1128/AAC.01142-19.
- 726 25. Lane TR, Massey C, Comer JE, Anantpadma M, Freundlich JS, Davey RA,  
727 Madrid PB, Ekins S. 2019. Repurposing The Antimalarial Pyronaridine

- 728           Tetraphosphate To Protect Against Ebola Virus Infection PLoS Negl Trop Dis In  
729           Press.
- 730   26.    Anantpadma M, Lane T, Zorn KM, Lingerfelt MA, Clark AM, Freundlich JS,  
731           Davey RA, Madrid P, Ekins S. 2019. Ebola Virus Bayesian Machine Learning  
732           Models Enable New In Vitro Leads ACS Omega 4:2353-2361.
- 733   27.    Croft SL, Duparc S, Arbe-Barnes SJ, Craft JC, Shin CS, Fleckenstein L,  
734           Borghini-Fuhrer I, Rim HJ. 2012. Review of pyronaridine anti-malarial properties  
735           and product characteristics. Malar J 11:270.
- 736   28.    Martin RE, Marchetti RV, Cowan AI, Howitt SM, Broer S, Kirk K. 2009.  
737           Chloroquine transport via the malaria parasite's chloroquine resistance  
738           transporter. Science 325:1680-2.
- 739   29.    Camarda G, Jirawatcharadech P, Priestley RS, Saif A, March S, Wong MHL,  
740           Leung S, Miller AB, Baker DA, Alano P, Paine MJI, Bhatia SN, O'Neill PM, Ward  
741           SA, Biagini GA. 2019. Antimalarial activity of primaquine operates via a two-step  
742           biochemical relay. Nat Commun 10:3226.
- 743   30.    Dziekan JM, Yu H, Chen D, Dai L, Wirjanata G, Larsson A, Prabhu N, Sobota  
744           RM, Bozdech Z, Nordlund P. 2019. Identifying purine nucleoside phosphorylase  
745           as the target of quinine using cellular thermal shift assay. Sci Transl Med 11.
- 746   31.    Anantpadma M, Kouznetsova J, Wang H, Huang R, Kolokoltssov A, Guha R,  
747           Lindstrom AR, Shtanko O, Simeonov A, Maloney DJ, Maury W, LaCount DJ,  
748           Jadhav A, Davey RA. 2016. Large-Scale Screening and Identification of Novel

- 749 Ebola Virus and Marburg Virus Entry Inhibitors. *Antimicrob Agents Chemother*  
750 60:4471-81.
- 751 32. Homewood CA, Warhurst DC, Peters W, Baggaley VC. 1972. Lysosomes, pH  
752 and the anti-malarial action of chloroquine. *Nature* 235:50-2.
- 753 33. Jayaraman SD, Ismail S, Nair NK, Navaratnam V. 1997. Determination of  
754 pyronaridine in blood plasma by high-performance liquid chromatography for  
755 application in clinical pharmacological studies. *J Chromatogr B Biomed Sci Appl*  
756 690:253-7.
- 757 34. Ramanathan S, Karupiah S, Nair NK, Olliaro PL, Navaratnam V, Wernsdorfer  
758 WH, Mansor SM. 2005. A new and simple solid-phase extraction method for LC  
759 determination of pyronaridine in human plasma. *J Chromatogr B Analyt Technol*  
760 *Biomed Life Sci* 824:45-50.
- 761 35. Rahim MN, Zhang Z, He S, Zhu W, Banadyga L, Safronetz D, Qiu X. 2018.  
762 Postexposure Protective Efficacy of T-705 (Favipiravir) Against Sudan Virus  
763 Infection in Guinea Pigs. *J Infect Dis* 218:S649-S657.
- 764 36. Ekins S, Lingerfelt MA, Comer JE, Freiberg AN, Mirsalis JC, O'Loughlin K,  
765 Harutyunyan A, McFarlane C, Green CE, Madrid PB. 2018. Efficacy of Tilorone  
766 Dihydrochloride against Ebola Virus Infection. *Antimicrob Agents Chemother* 62.
- 767 37. Sissoko D, Laouenan C, Folkesson E, M'Lebing A-B, Beavogui A-H, Baize S,  
768 Camara A-M, Maes P, Shepherd S, Danel C, Carazo S, Conde MN, Gala J-L,  
769 Colin G, Savini H, Bore JA, Le Marcis F, Koundouno FR, Petitjean F, Lamah M-

- 770 C, Diederich S, Tounkara A, Poelart G, Berbain E, Dindart J-M, Duraffour S,  
771 Lefevre A, Leno T, Peyrouset O, Irengue L, Bangoura NF, Palich R, Hinzmann J,  
772 Kraus A, Barry TS, Berette S, Bongono A, Camara MS, Chanfreau Munoz V,  
773 Doumbouya L, Souley H, Kighoma PM, Koundouno FR, René L, Loua CM,  
774 Massala V, Moumouni K, Provost C, Samake N, Sekou C, et al. 2016.  
775 Experimental treatment with Favipiravir for Ebola Virus Disease (the JIKI Trial): A  
776 historically controlled, single-arm proof-of-concept trial in Guinea. PLOS  
777 Medicine 13:e1001967.
- 778 38. Smither SJ, Eastaugh LS, Steward JA, Nelson M, Lenk RP, Lever MS. 2014.  
779 Post-exposure efficacy of oral T-705 (Favipiravir) against inhalational Ebola virus  
780 infection in a mouse model. Antiviral Res 104:153-5.
- 781 39. Oestereich L, Ludtke A, Wurr S, Rieger T, Munoz-Fontela C, Gunther S. 2014.  
782 Successful treatment of advanced Ebola virus infection with T-705 (favipiravir) in  
783 a small animal model. Antiviral Res 105:17-21.
- 784 40. Comer JE, Escaffre O, Neef N, Brasel T, Juelich TL, Smith JK, Smith J,  
785 Kalveram B, Perez DD, Massey S, Zhang L, Freiberg AN. 2019. Filovirus  
786 Virulence in Interferon alpha/beta and gamma Double Knockout Mice, and  
787 Treatment with Favipiravir. Viruses 11.
- 788 41. Bixler SL, Bocan TM, Wells J, Wetzel KS, Van Tongeren SA, Dong L, Garza NL,  
789 Donnelly G, Cazares LH, Nuss J, Soloveva V, Koistinen KA, Welch L, Epstein C,  
790 Liang LF, Giesing D, Lenk R, Bavari S, Warren TK. 2018. Efficacy of favipiravir

- 791 (T-705) in nonhuman primates infected with Ebola virus or Marburg virus.  
792 Antiviral Res 151:97-104.
- 793 42. Guedj J, Piorkowski G, Jacquot F, Madelain V, Nguyen THT, Rodallec A,  
794 Gunther S, Carbonnelle C, Mentre F, Raoul H, de Lamballerie X. 2018. Antiviral  
795 efficacy of favipiravir against Ebola virus: A translational study in cynomolgus  
796 macaques. PLoS Med 15:e1002535.
- 797 43. Bai CQ, Mu JS, Kargbo D, Song YB, Niu WK, Nie WM, Kanu A, Liu WW, Wang  
798 YP, Dafee F, Yan T, Hu Y, Deng YQ, Lu HJ, Yang F, Zhang XG, Sun Y, Cao YX,  
799 Su HX, Sun Y, Liu WS, Wang CY, Qian J, Liu L, Wang H, Tong YG, Liu ZY,  
800 Chen YS, Wang HQ, Kargbo B, Gao GF, Jiang JF. 2016. Clinical and Virological  
801 Characteristics of Ebola Virus Disease Patients Treated With Favipiravir (T-705)-  
802 Sierra Leone, 2014. Clin Infect Dis 63:1288-1294.
- 803 44. Siegel D, Hui HC, Doerffler E, Clarke MO, Chun K, Zhang L, Neville S, Carra E,  
804 Lew W, Ross B, Wang Q, Wolfe L, Jordan R, Soloveva V, Knox J, Perry J,  
805 Perron M, Stray KM, Barauskas O, Feng JY, Xu Y, Lee G, Rheingold AL, Ray  
806 AS, Bannister R, Strickley R, Swaminathan S, Lee WA, Bavari S, Cihlar T, Lo  
807 MK, Warren TK, Mackman RL. 2017. Discovery and Synthesis of a  
808 Phosphoramidate Prodrug of a Pyrrolo[2,1-f][triazin-4-amino] Adenine C-  
809 Nucleoside (GS-5734) for the Treatment of Ebola and Emerging Viruses. J Med  
810 Chem 60:1648-1661.
- 811 45. Qiu X, Wong G, Audet J, Bello A, Fernando L, Alimonti JB, Fausther-Bovendo H,  
812 Wei H, Aviles J, Hiatt E, Johnson A, Morton J, Swope K, Bohorov O, Bohorova

- 813 N, Goodman C, Kim D, Pauly MH, Velasco J, Pettitt J, Olinger GG, Whaley K, Xu  
814 B, Strong JE, Zeitlin L, Kobinger GP. 2014. Reversion of advanced Ebola virus  
815 disease in nonhuman primates with ZMapp. *Nature* 514:47-53.
- 816 46. Corti D, Misasi J, Mulangu S, Stanley DA, Kanekiyo M, Wollen S, Ploquin A,  
817 Doria-Rose NA, Staupe RP, Bailey M, Shi W, Choe M, Marcus H, Thompson EA,  
818 Cagigi A, Silacci C, Fernandez-Rodriguez B, Perez L, Sallusto F, Vanzetta F,  
819 Agatic G, Cameroni E, Kisalu N, Gordon I, Ledgerwood JE, Mascola JR, Graham  
820 BS, Muyembe-Tamfun JJ, Trefry JC, Lanzavecchia A, Sullivan NJ. 2016.  
821 Protective monotherapy against lethal Ebola virus infection by a potently  
822 neutralizing antibody. *Science* 351:1339-42.
- 823 47. Sivapalasingam S, Kamal M, Slim R, Hosain R, Shao W, Stoltz R, Yen J, Pologe  
824 LG, Cao Y, Partridge M, Sumner G, Lipsich L. 2018. Safety, pharmacokinetics,  
825 and immunogenicity of a co-formulated cocktail of three human monoclonal  
826 antibodies targeting Ebola virus glycoprotein in healthy adults: a randomised,  
827 first-in-human phase 1 study. *Lancet Infect Dis* 18:884-893.
- 828 48. Dowall SD, Bosworth A, Watson R, Bewley K, Taylor I, Rayner E, Hunter L,  
829 Pearson G, Easterbrook L, Pitman J, Hewson R, Carroll MW. 2015. Chloroquine  
830 inhibited Ebola virus replication in vitro but failed to protect against infection and  
831 disease in the in vivo guinea pig model. *J Gen Virol* 96:3484-3492.
- 832 49. Dyall J, Johnson JC, Hart BJ, Postnikova E, Cong Y, Zhou H, Gerhardt DM,  
833 Michelotti J, Honko AN, Kern S, DeWald LE, O'Loughlin KG, Green CE, Mirsalis

- 834 JC, Bennett RS, Olinger GG, Jr., Jahrling PB, Hensley LE. 2018. In Vitro and In  
835 Vivo Activity of Amiodarone Against Ebola Virus. *J Infect Dis* 218:S592-S596.
- 836 50. Miller JL, Spiro SG, Dowall SD, Taylor I, Rule A, Alonzi DS, Sayce AC, Wright E,  
837 Bentley EM, Thom R, Hall G, Dwek RA, Hewson R, Zitzmann N. 2016. Minimal  
838 In Vivo Efficacy of Iminosugars in a Lethal Ebola Virus Guinea Pig Model. *PLoS*  
839 *One* 11:e0167018.
- 840 51. Dowall SD, Bewley K, Watson RJ, Vasani SS, Ghosh C, Konai MM, Gausdal G,  
841 Lorens JB, Long J, Barclay W, Garcia-Dorival I, Hiscox J, Bosworth A, Taylor I,  
842 Easterbrook L, Pitman J, Summers S, Chan-Pensley J, Funnell S, Vipond J,  
843 Charlton S, Haldar J, Hewson R, Carroll MW. 2016. Antiviral Screening of  
844 Multiple Compounds against Ebola Virus. *Viruses* 8.
- 845 52. Wec AZ, Bornholdt ZA, He S, Herbert AS, Goodwin E, Wirchnianski AS, Gunn  
846 BM, Zhang Z, Zhu W, Liu G, Abelson DM, Moyer CL, Jangra RK, James RM,  
847 Bakken RR, Bohorova N, Bohorov O, Kim DH, Pauly MH, Velasco J, Bortz RH,  
848 3rd, Whaley KJ, Goldstein T, Anthony SJ, Alter G, Walker LM, Dye JM, Zeitlin L,  
849 Qiu X, Chandran K. 2019. Development of a Human Antibody Cocktail that  
850 Deploys Multiple Functions to Confer Pan-Ebolavirus Protection. *Cell Host*  
851 *Microbe* 25:39-48 e5.
- 852 53. Rijal P, Elias SC, Machado SR, Xiao J, Schimanski L, O'Dowd V, Baker T, Barry  
853 E, Mendelsohn SC, Cherry CJ, Jin J, Labbe GM, Donnellan FR, Rampling T,  
854 Dowall S, Rayner E, Findlay-Wilson S, Carroll M, Guo J, Xu XN, Huang KA,  
855 Takada A, Burgess G, McMillan D, Popplewell A, Lightwood DJ, Draper SJ,



- 856 Townsend AR. 2019. Therapeutic Monoclonal Antibodies for Ebola Virus  
857 Infection Derived from Vaccinated Humans. *Cell Rep* 27:172-186 e7.
- 858 54. Madelain V, Guedj J, Mentre F, Nguyen TH, Jacquot F, Oestereich L, Kadota T,  
859 Yamada K, Taburet AM, de Lamballerie X, Raoul H. 2017. Favipiravir  
860 Pharmacokinetics in Nonhuman Primates and Insights for Future Efficacy  
861 Studies of Hemorrhagic Fever Viruses. *Antimicrob Agents Chemother* 61.
- 862 55. Morris CA, Pokorny R, Lopez-Lazaro L, Miller RM, Arbe-Barnes S, Duparc S,  
863 Borghini-Fuhrer I, Shin JS, Fleckenstein L. 2014. Pharmacokinetic interaction  
864 between pyronaridine-artesunate and metoprolol. *Antimicrob Agents Chemother*  
865 58:5900-8.
- 866 56. Johansen LM, Brannan JM, Delos SE, Shoemaker CJ, Stossel A, Lear C,  
867 Hoffstrom BG, DeWald LE, Schornberg KL, Scully C, Lehár J, Hensley LE, White  
868 JM, Olinger GG. 2013. FDA-approved selective estrogen receptor modulators  
869 inhibit Ebola virus infection. *Sci Transl Med* 5:190ra79-190ra79.
- 870 57. Fischer J, Lullmann H, Lullmann-Rauch R. 1996. Drug-induced lysosomal  
871 storage of sulphated glycosaminoglycans. *Gen Pharmacol* 27:1317-24.
- 872 58. Tyteca D, Van Der Smissen P, Mettlen M, Van Bambeke F, Tulkens PM,  
873 Mingeot-Leclercq MP, Courtoy PJ. 2002. Azithromycin, a lysosomotropic  
874 antibiotic, has distinct effects on fluid-phase and receptor-mediated endocytosis,  
875 but does not impair phagocytosis in J774 macrophages. *Exp Cell Res* 281:86-  
876 100.

- 877 59. Ikeda K, Hirayama M, Hirota Y, Asa E, Seki J, Tanaka Y. 2008. Drug-induced  
878 phospholipidosis is caused by blockade of mannose 6-phosphate receptor-  
879 mediated targeting of lysosomal enzymes. *Biochem Biophys Res Commun*  
880 377:268-74.
- 881 60. Chen F, Song Q, Yu Q. 2018. Axl inhibitor R428 induces apoptosis of cancer  
882 cells by blocking lysosomal acidification and recycling independent of Axl  
883 inhibition. *Am J Cancer Res* 8:1466-1482.
- 884 61. Duvvuri M, Konkar S, Hong KH, Blagg BS, Krise JP. 2006. A new approach for  
885 enhancing differential selectivity of drugs to cancer cells. *ACS Chem Biol* 1:309-  
886 15.
- 887 62. Ghosh C, Chaubey S, Tatu U, Haldar J. 2017. Aryl-alkyl-lysines: small molecular  
888 membrane-active antiplasmodial agents. *Medchemcomm* 8:434-439.
- 889 63. Zhang K, Xu WW, Zhang Z, Liu J, Li J, Sun L, Sun W, Jiao P, Sang X, Ren Z, Yu  
890 Z, Li Y, Feng N, Wang T, Wang H, Yang S, Zhao Y, Zhang X, Wilker PR, Liu W,  
891 Liao M, Chen H, Gao Y, Xia X. 2017. The innate immunity of guinea pigs against  
892 highly pathogenic avian influenza virus infection. *Oncotarget* 8:30422-30437.
- 893 64. Chepurnov AA, Dadaeva AA, Kolesnikov SI. 2001. Study of the pathogenesis of  
894 Ebola fever in laboratory animals with different sensitivity to this virus. *Bull Exp*  
895 *Biol Med* 132:1182-6.

- 896 65. Mankowski DC, Laddison KJ, Christopherson PA, Ekins S, Tweedie DJ, Lawton  
897 MP. 1999. Molecular cloning, expression, and characterization of CYP2D17 from  
898 cynomolgus monkey liver. *Arch Biochem Biophys* 372:189-96.
- 899 66. Shimada T, Mimura M, Inoue K, Nakamura S, Oda H, Ohmori S, Yamazaki H.  
900 1997. Cytochrome P450-dependent drug oxidation activities in liver microsomes  
901 of various animal species including rats, guinea pigs, dogs, monkeys, and  
902 humans. *Arch Toxicol* 71:401-8.
- 903 67. Volchkov VE, Chepurnov AA, Volchkova VA, Ternovoj VA, Klenk HD. 2000.  
904 Molecular characterization of guinea pig-adapted variants of Ebola virus. *Virology*  
905 277:147-55.
- 906 68. Cong Y, Dyall J, Hart BJ, DeWald LE, Johnson JC, Postnikova E, Zhou H, Gross  
907 R, Rojas O, Alexander I, Josleyn N, Zhang T, Michelotti J, Janosko K, Glass PJ,  
908 Flint M, McMullan LK, Spiropoulou CF, Mierzwa T, Guha R, Shinn P, Michael S,  
909 Klumpp-Thomas C, McKnight C, Thomas C, Eakin AE, O'Loughlin KG, Green  
910 CE, Catz P, Mirsalis JC, Honko AN, Olinger GG, Jr., Bennett RS, Holbrook MR,  
911 Hensley LE, Jahrling PB. 2016. Evaluation of the Activity of Lamivudine and  
912 Zidovudine against Ebola Virus. *PLoS One* 11:e0166318.
- 913 69. Quinn K, Brindley MA, Weller ML, Kaludov N, Kondratowicz A, Hunt CL, Sinn PL,  
914 McCray PB, Jr., Stein CS, Davidson BL, Flick R, Mandell R, Staplin W, Maury W,  
915 Chiorini JA. 2009. Rho GTPases modulate entry of Ebola virus and vesicular  
916 stomatitis virus pseudotyped vectors. *J Virol* 83:10176-86.

917 70. Brouillette RB, Maury W. 2017. Production of Filovirus Glycoprotein-Pseudotyped  
918 Vesicular Stomatitis Virus for Study of Filovirus Entry Mechanisms. *Methods Mol*  
919 *Biol* 1628:53-63.

920

921

922

923

924 **FIG 1** Pyronaridine, tilorone and quinacrine efficacy and cytotoxicity dose response  
925 relationship against multiple strains of EBOV (Kikwit, Mayinga and Makona) and MARV  
926 (Musoke and Angola) in HeLa cells. (EBOV/Kik, Mak, May: MOI 0.21; MARV/Ang: MOI  
927 0.21; MARV/Mus: MOI 0.4).

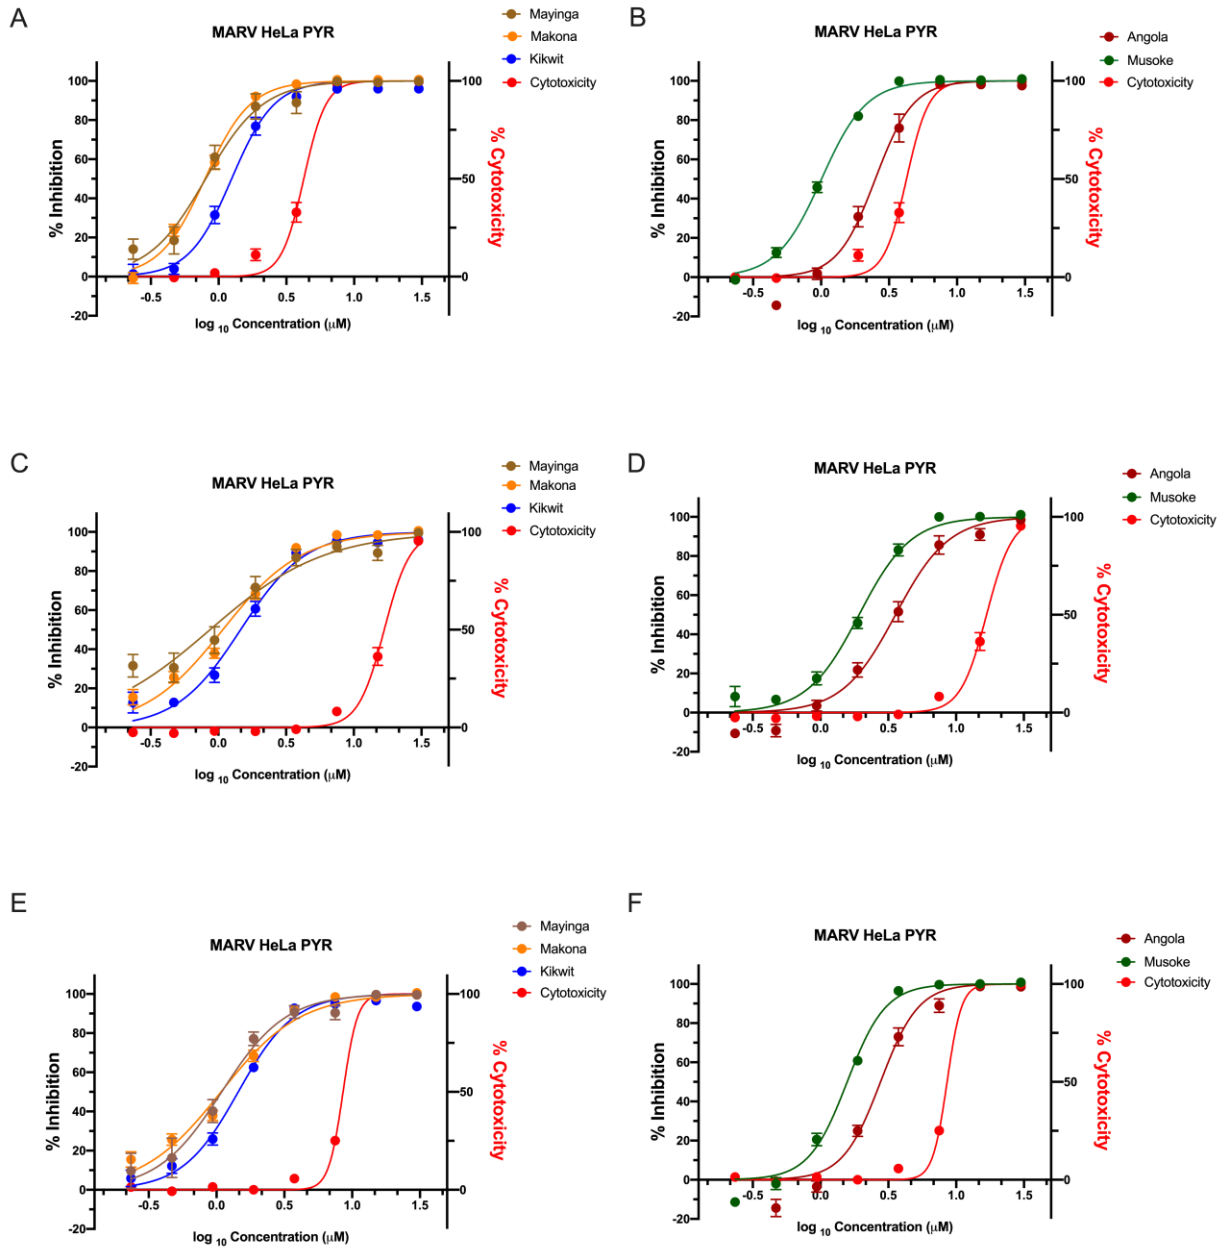

928

929

930 **FIG 2** Guinea pig dose range-finding toxicity and Pharmacokinetics profile of  
931 Pyronaridine administered via oral gavage (A,B,C) or by intraperitoneal injection (D,E,F)  
932

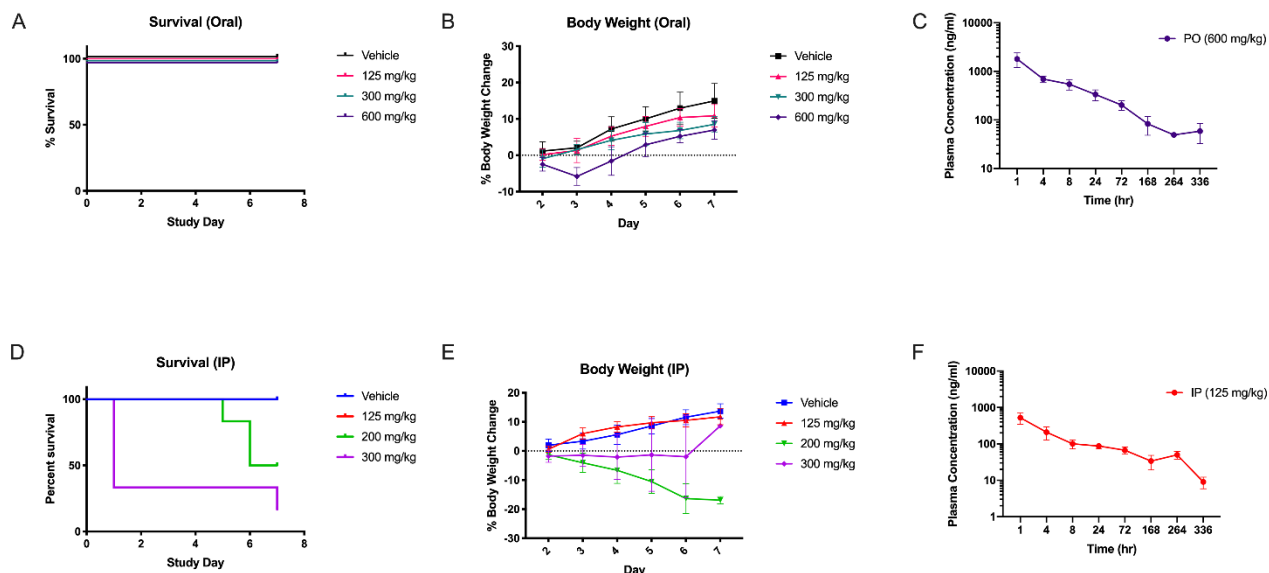

933

934

935

936

937

938 **FIG 3** Guinea pig dose range-finding efficacy. gaEBOV efficacy data. Data from  
939 favipiravir and vehicle-treated (combined, n=16) groups were combined from our own  
940 two independent studies in order to strengthen their predictive power. (A) The survival  
941 curves between pyronaridine 300 and 600 mg/kg, favipiravir and vehicle. Asterisks  
942 represent significant difference from the vehicle (Log-rank (Mantel-Cox) test;  
943 Pyronaridine p=0.0307; Favipiravir p=0.0014). B. Mean percent body weight change  
944 from SD0 C. Mean clinical scoring results with overlaid percent survival. D. Plaque  
945 assay for viable EBOV in sera (GPs sacrificed based on clinical score) with Dunnett's  
946 T3 multiple comparisons test. Statistical significance was calculated with log-  
947 transformed plaque assay data using a Dunnett's T3 multiple comparisons test  
948 (Forsythe and Welch ANOVA) with the vehicle designated as the control. The difference  
949 from the vehicle was not found to be significant. For the plaque assay gaEBOV viral  
950 load had LLOD of 100 PFU/ml. Quantified values below these were set to 0.5 x LLOD.  
951 Bars and error-bars represents the geometric mean and geometric SD.

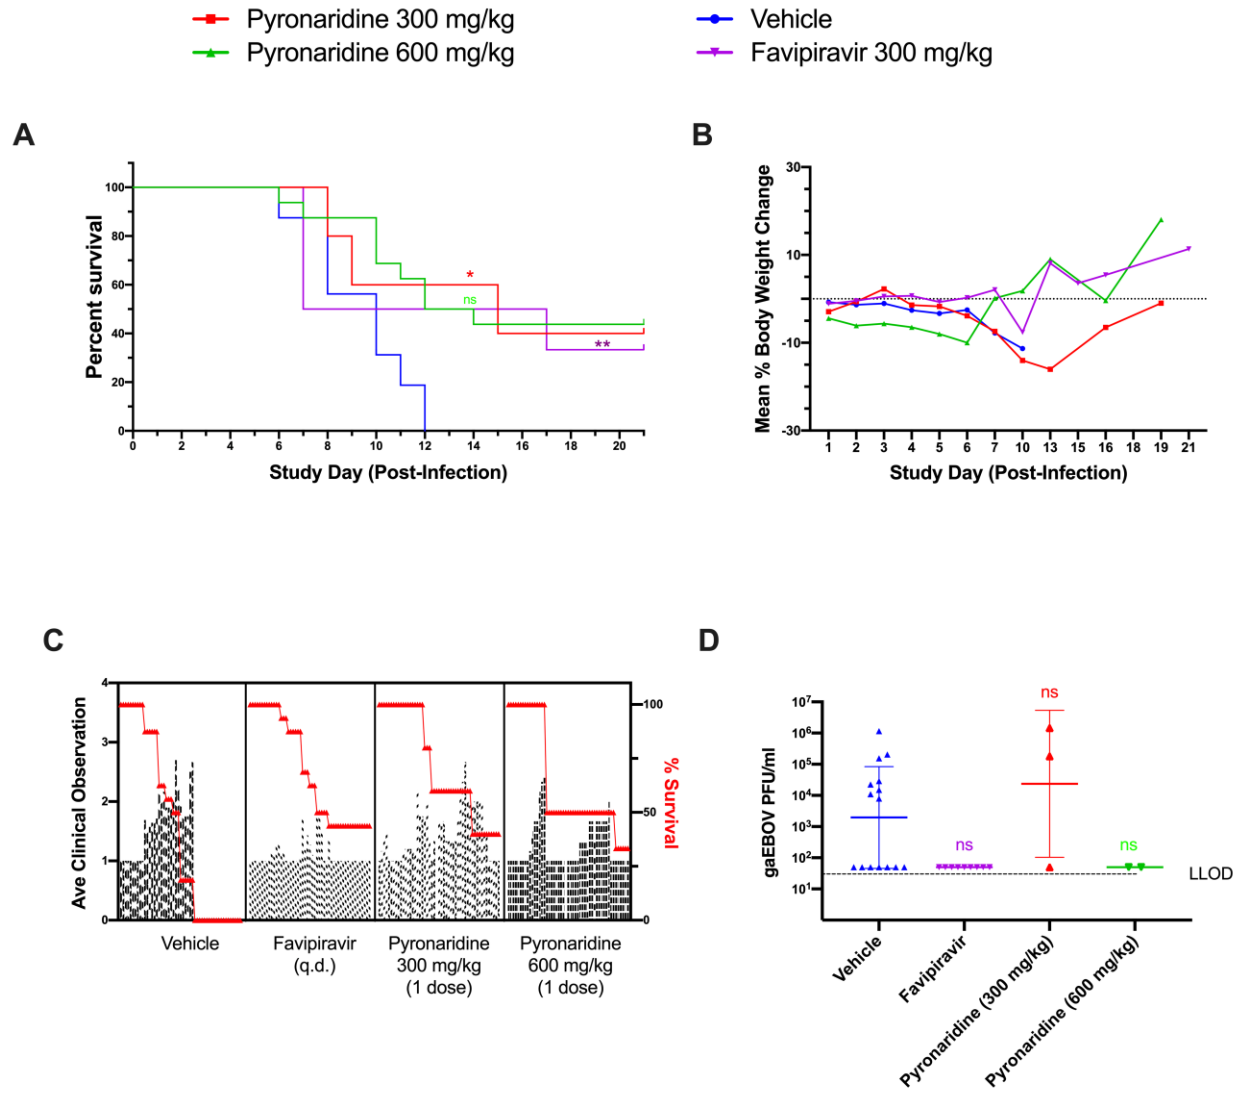

952

953

954

955

956



**Table 1** Pyronaridine, tilorone and quinacrine ( $\pm$  SD) show a similar efficacy against multiple strains of EBOV (Kikwit, Mayinga and Makona) and MARV (Musoke and Angola) in HeLa cells. Analysis via a F-test rejects the hypothesis that the  $CC_{50}$  and the respective  $IC_{50}$  are the same for each of the compounds evaluated (EBOV, Mayinga, tilorone is ambiguous).

| Compound     | $CC_{50}$ ( $\mu$ M) <sup>a</sup> | Virus | Strain  | MOI  | $IC_{50}$ ( $\mu$ M) <sup>b</sup> | SI <sup>c</sup> |
|--------------|-----------------------------------|-------|---------|------|-----------------------------------|-----------------|
| Pyronaridine | 4.11 $\pm$ 0.50                   | EBOV  | Kikwit  | 0.21 | 1.30 $\pm$ 0.42                   | 3.2             |
|              |                                   |       | Makona  | 0.21 | 0.82 $\pm$ 0.19                   | 5.0             |
|              |                                   |       | Mayinga | 0.21 | 1.01 $\pm$ 0.58                   | 4.1             |
|              |                                   | MARV  | Angola  | 0.21 | 2.72 $\pm$ 0.97                   | 1.6             |
|              |                                   |       | Musoke  | 0.4  | 1.01 $\pm$ 0.11                   | 4.1             |
| Tilorone     | 18.04 $\pm$ 3.04                  | EBOV  | Kikwit  | 0.21 | 1.48 $\pm$ 0.47                   | 12.2            |
|              |                                   |       | Makona  | 0.21 | 1.14 $\pm$ 0.38                   | 15.9            |
|              |                                   |       | Mayinga | 0.21 | 1.21 $\pm$ 1.07                   | 15.0            |

|                   |                 |             |         |      |                 |     |
|-------------------|-----------------|-------------|---------|------|-----------------|-----|
| <b>Quinacrine</b> | $8.62 \pm 0.02$ | <b>MARV</b> | Angola  | 0.21 | $4.51 \pm 1.93$ | 4.1 |
|                   |                 |             | Musoke  | 0.4  | $2.05 \pm 0.28$ | 8.8 |
|                   |                 | <b>EBOV</b> | Kikwit  | 0.21 | $1.41 \pm 0.25$ | 6.1 |
|                   |                 |             | Makona  | 0.21 | $1.05 \pm 0.26$ | 8.2 |
|                   |                 |             | Mayinga | 0.21 | $1.48 \pm 0.65$ | 5.8 |
|                   |                 | <b>MARV</b> | Angola  | 0.21 | $2.94 \pm 0.76$ | 2.9 |
|                   |                 |             | Musoke  | 0.4  | $1.57 \pm 0.17$ | 5.5 |

<sup>a</sup>Cytotoxicity was determined in HeLa cells that were mock infected. Data represent average of 3 dose response curves with 3 replicates per dose.

<sup>b</sup>Efficacy was determined in HeLa cells infected at an MOI of 0.21. Data represent average of 4-6 dose response curves with 3 replicates per dose.

<sup>c</sup>SI=CC<sub>50</sub>/IC<sub>50</sub>

Abbreviations:  $CC_{50}$ , 50% cytotoxic concentration;  $IC_{50}$ , 50 % inhibitory concentration; SI, selectivity index; MOI, multiplicity of infection.

**Table 2** Liver microsomal metabolic stability across species

| Species           |                              | Pyronaridine | Tilorone | Chloroquine | Quinacrine |
|-------------------|------------------------------|--------------|----------|-------------|------------|
| Mouse             | $t_{1/2}$ (min)              | >186         | 102.7    | 47.3        | 12.6       |
|                   | $Cl_{int}$ ( $\mu$ L min/mg) | <7.4         | 13.5     | 29.3        | 110.0      |
|                   | $R^2$                        | 0.65*        | 0.91     | 0.96        | 0.98       |
| Guinea Pig        | $t_{1/2}$ (min)              | 66.1         | 12.2     | 132.6       | 17.1       |
|                   | $Cl_{int}$ ( $\mu$ L min/mg) | 21.0         | 113.7    | 10.5        | 81.3       |
|                   | $R^2$                        | 0.86         | 1.00     | 0.90        | 0.98       |
| Non-Human Primate | $t_{1/2}$ (min)              | 89.7         | 94.3     | 106.8       | 10.1       |
|                   | $Cl_{int}$ ( $\mu$ L min/mg) | 15.5         | 14.7     | 13.0        | 137.4      |
|                   | $R^2$                        | 0.98         | 0.98     | 0.97        | 0.98       |
| Human             | $t_{1/2}$ (min)              | 122.2        | 127.1    | 201.4       | 27.5       |
|                   | $Cl_{int}$ ( $\mu$ L min/mg) | 11.4         | 10.9     | 6.9         | 50.5       |

|                                                                                                                                                             |       |      |      |      |      |
|-------------------------------------------------------------------------------------------------------------------------------------------------------------|-------|------|------|------|------|
|                                                                                                                                                             | $R^2$ | 0.81 | 0.98 | 0.95 | 0.97 |
| * Poor fit of the data. Based on previous data (unpublished) using 1 mg LM/rxn, as opposed to 0.5 mg/rx, suggest metabolism in MLM and HLM are very similar |       |      |      |      |      |

**Table 3** Mean pharmacokinetics data in male guinea pigs treated with pyronaridine

| Dose<br>(mg/kg) | Administration | Sex<br>(n=3) | T <sub>1/2</sub><br>(h) | SE  | T <sub>max</sub><br>(h) | C <sub>max</sub><br>(ng/ml) |     | AUC <sub>last</sub><br>(hr*ng/ml) |      | AUC <sub>inf</sub><br>(hr*ng/ml) |      |
|-----------------|----------------|--------------|-------------------------|-----|-------------------------|-----------------------------|-----|-----------------------------------|------|----------------------------------|------|
|                 |                |              |                         |     |                         | Mean                        | SE  | Mean                              | SE   | Mean                             | SE   |
| 125             | IP             | M            | 72.7                    | 9.3 | 1                       | 523                         | 175 | 16,565                            | 5269 | 17,430                           | 5428 |
| 600             | Oral           | M            | 90.5                    | 3.9 | 1                       | 1800                        | 348 | 50,964                            | 4406 | 58,783                           | 6712 |
